# Supplementary material
Source: publisher figshare collection journal article supplement (https://tandf.figshare.com/ndownloader/files/18130205)
Supplement: Supplementary file 1 [file 18130205]

**Supplementary Figure 1**. Changes of grain and straw yields during dry season in a long-term fertilized paddy soil of Bangladesh double rice cropping system. Bars indicate mean value ±standard error (n=3).

**Supplementary Figure 2.** Changes of grain and straw yields during wet season in a long-term fertilized paddy soil of Bangladesh double rice cropping system. Bars indicate mean value ±standard error (n=3).
